# Supplementary material for: Safety and cognitive pharmacodynamics following dose escalations with 3-methylmethcathinone (3-MMC): a first in human, designer drug study
Source: Springer Nature journal article supplement (doi:10.1038/s41386-024-02042-7), 2024-12-24

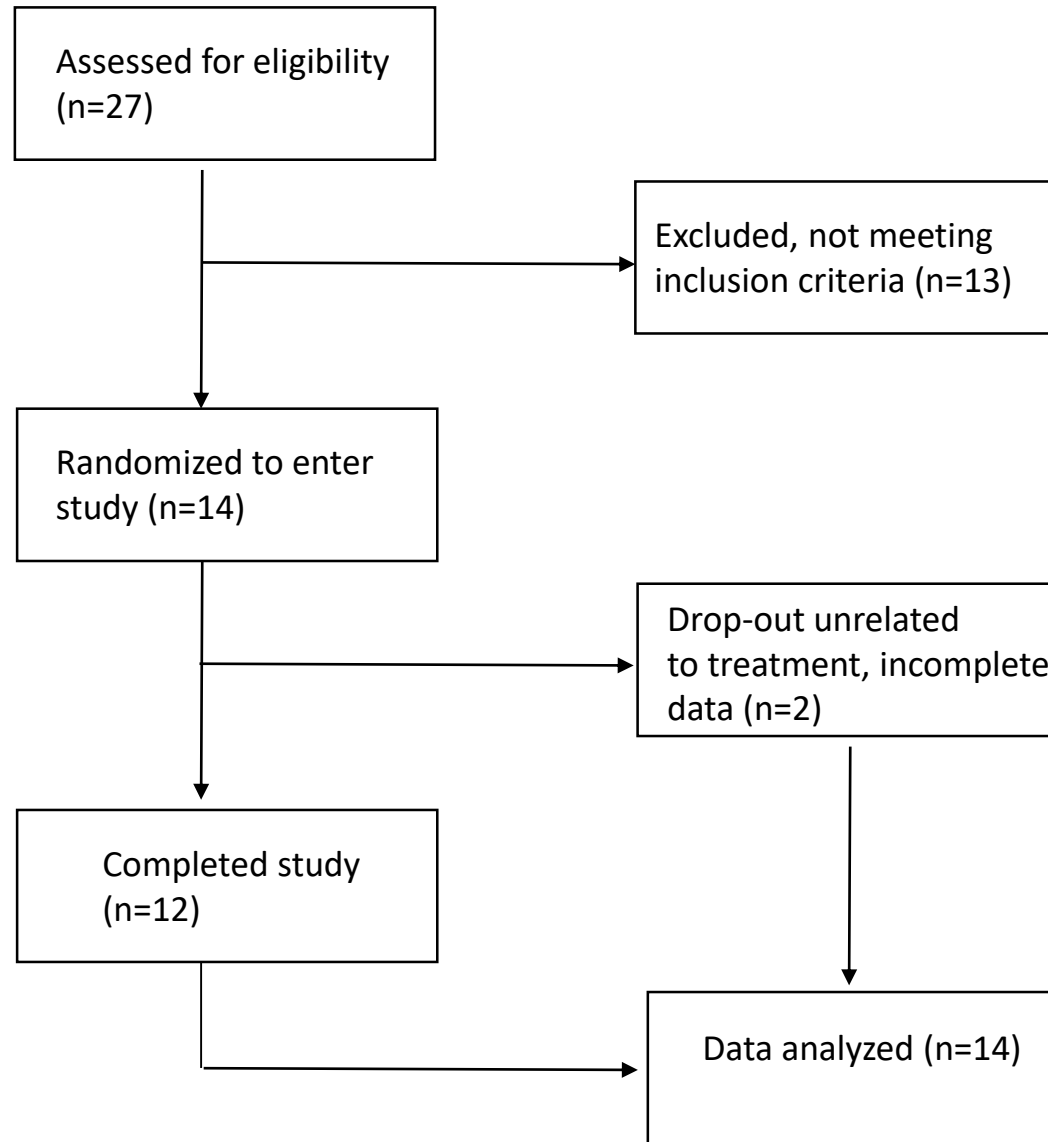

Supplement: MOESM1 [file 41386_2024_2042_MOESM1_ESM.pdf]
